# Supplementary material for: Limited Plasmodium sporozoite gliding motility in the absence of TRAP family adhesins
Source: PubMed Central journal article supplement (PMC8557484; doi:10.1186/s12936-021-03960-3), 2021-10-30
Supplement: 12936_2021_3960_MOESM1_ESM.pdf [file 12936_2021_3960_MOESM1_ESM.pdf]

# Figure S1

## Generation of TLP(-)/TRAP(-) parasites

**A**

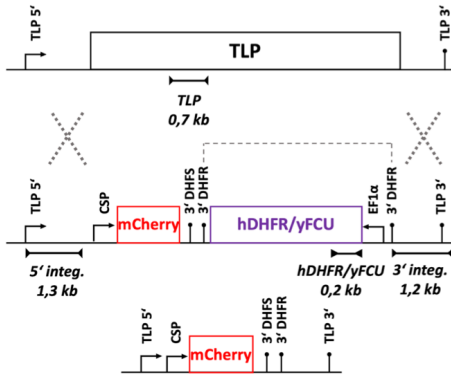

**B**

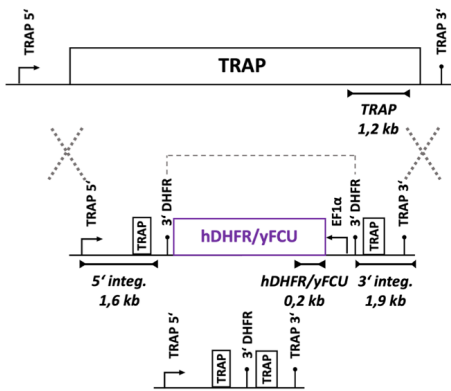

**C**

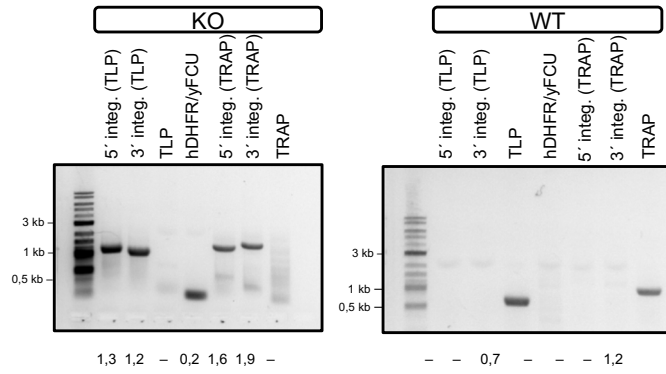

**D**

| target          | Forward primer | reverse primer | predicted length |
|-----------------|----------------|----------------|------------------|
| 5'integ. (TLP)  | P112           | P244           | 1,3 kb           |
| 3'integ. (TLP)  | P586           | P113           | 1,2 kb           |
| TLP             | P1192          | P1193          | 0,7 kb           |
| hDHFR/yFCU      | P187           | P241           | 0,2 kb           |
| 5'integ. (TRAP) | P171           | P513           | 1,6 kb           |
| 3'integ. (TRAP) | P586           | P174           | 1,9 kb           |
| TRAP            | P599           | P595           | 1,2 kb           |
