# Supplementary material for: Limited Plasmodium sporozoite gliding motility in the absence of TRAP family adhesins
Source: PubMed Central journal article supplement (PMC8557484; doi:10.1186/s12936-021-03960-3), 2021-10-30
Supplement: 12936_2021_3960_MOESM2_ESM.pdf [file 12936_2021_3960_MOESM2_ESM.pdf]

# Figure S2

## Generation of TLP(-)/TREP(-) parasites

**A**

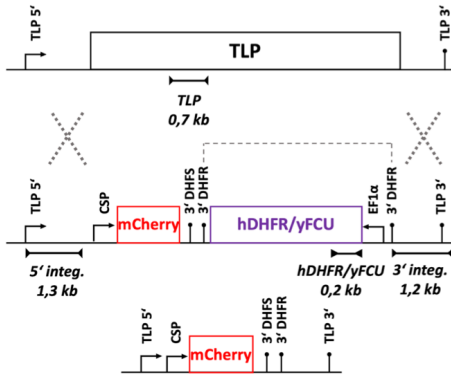

**B**

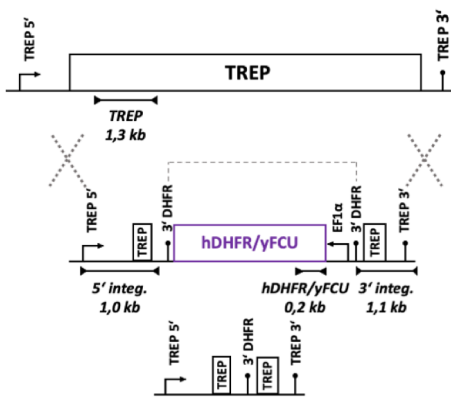

**C**

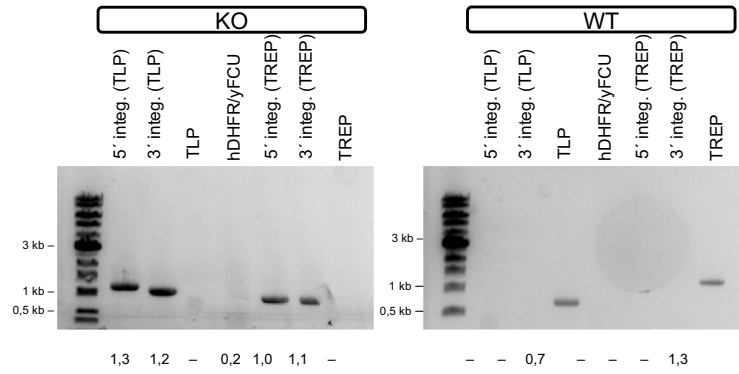

**D**

| target          | forward primer | Reverse primer | predicted length |
|-----------------|----------------|----------------|------------------|
| 5'integ. (TLP)  | P112           | P244           | 1,3 kb           |
| 3'integ. (TLP)  | P586           | P113           | 1,2 kb           |
| TLP             | P1192          | P1193          | 0,7 kb           |
| hDHFR/yFCU      | P187           | P241           | 0,2 kb           |
| 5'integ. (TREP) | P104           | P668           | 1,0 kb           |
| 3'integ. (TREP) | P586           | P105           | 1,1 kb           |
| S6              | P323           | P332           | 1,3 kb           |
