# Supplementary material for: Limited Plasmodium sporozoite gliding motility in the absence of TRAP family adhesins
Source: PubMed Central journal article supplement (PMC8557484; doi:10.1186/s12936-021-03960-3), 2021-10-30
Supplement: 12936_2021_3960_MOESM3_ESM.pdf [file 12936_2021_3960_MOESM3_ESM.pdf]

# Figure S3 Generation of TREP(-)/TRAP(-) parasites

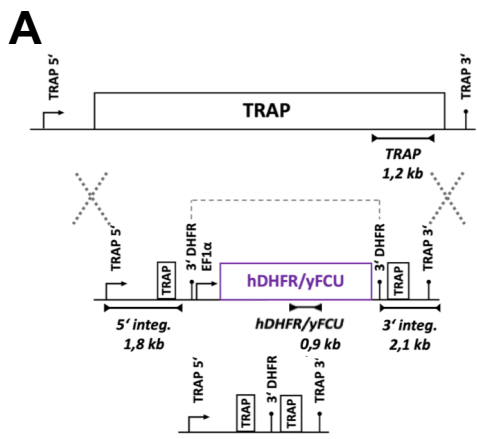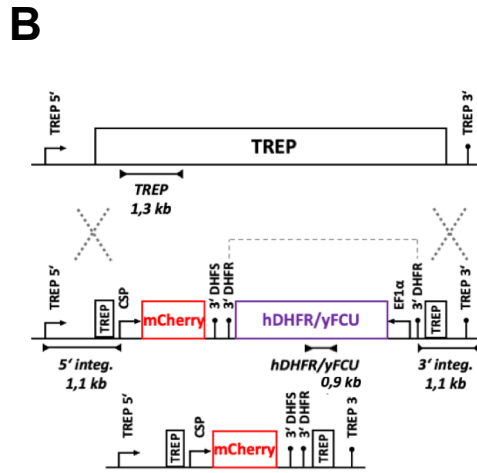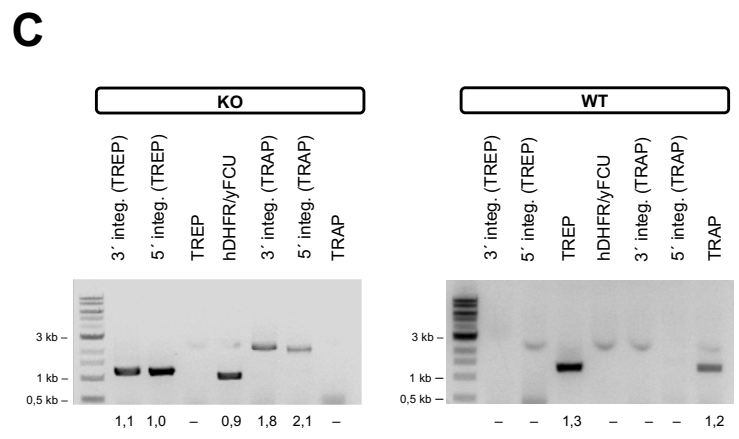

**D**

| target           | forward primer | reverse primer | predicted length |
|------------------|----------------|----------------|------------------|
| 3' integ. (TREP) | P586           | P105           | 1,1 kb           |
| 5' integ. (TREP) | P104           | P244           | 1,0 kb           |
| TREP             | P323           | P332           | 1,3 kb           |
| hDHFR/yFCU       | P961           | P962           | 0,9 kb           |
| 3' integ. (TRAP) | P1556          | P174           | 2,1 kb           |
| 5' integ. (TRAP) | P591           | P586           | 1,8 kb           |
| TRAP             | P599           | P595           | 1,2 kb           |
